# Supplementary material for: A high entropy metallic–high entropy nonmetallic community as a high performance electrocatalyst for the oxygen evolution reaction and oxygen reduction reaction
Source: Royal Society of Chemistry journal article supplement (doi:10.1039/d4sc05326e), 2024-01-01
Supplement: d4sc05326e1.pdf [file d4sc05326e1.pdf]

# **High Entropy Metallic-High Entropy Nonmetallic Community as High Performance Electrocatalysts for Oxygen Evolution Reaction and Oxygen Reduction Reaction**

Chunyan Zhang,<sup>a</sup> Hang Li,<sup>a</sup> Mengfei Su,<sup>a</sup> Shengfa Li,<sup>a</sup> Feng Gao,<sup>b\*</sup> and Qingyi Lu<sup>a\*</sup>

<sup>a</sup> State Key Laboratory of Coordination Chemistry, Coordination Chemistry Institute, Collaborative Innovation Center of Advanced Microstructures, School of Chemistry and Chemical Engineering, Nanjing University, Nanjing 210023, P. R. China. E-mail: qylu@nju.edu.cn

<sup>b</sup> Department of Materials Science and Engineering, Jiangsu Key Laboratory of Artificial Functional Materials, Collaborative Innovation Center of Advanced Microstructures, College of Engineering and Applied Sciences, Nanjing University, Nanjing 210023, P. R. China. E-mail: fgao@nju.edu.cn

## Experimental

**Chemicals and materials:** Raw chemical materials including cobalt chloride ( $\text{CoCl}_2 \cdot 6\text{H}_2\text{O}$ , AR,  $\geq 98\%$ ), nickel chloride ( $\text{NiCl}_2 \cdot 6\text{H}_2\text{O}$ , AR,  $\geq 98\%$ ), iron(III) nitrate ( $\text{Fe}(\text{NO}_3)_3 \cdot 9\text{H}_2\text{O}$ , AR,  $\geq 98\%$ ), manganese chloride ( $\text{MnCl}_2 \cdot 4\text{H}_2\text{O}$ , AR,  $\geq 98\%$ ), chromic chloride ( $\text{CrCl}_2 \cdot 6\text{H}_2\text{O}$ , AR,  $\geq 98\%$ ), urea (AR,  $\geq 99\%$ ), aminotriazole (AR,  $\geq 98\%$ ), sodium hypophosphite, thiourea, polyvinylpyrrolidone (K30, PVP, AR,  $\geq 99\%$ ) were purchased from Shanghai Macklin Biochemical Co., Ltd. All the reagents were used directly without further purification.

**Synthesis of the high entropy metal precursor:** Firstly, 25 mL DMF, 2 mL deionized water and 2 mL ethyl alcohol were mixed and stirred well to form a uniform solution. Secondly, equimolar amount of 0.5 mmol of cobalt chloride, nickel chloride, iron (III) nitrate, manganese chloride, and chromic chloride, 0.5 g of urea and 0.5 mmol aminotriazole were added into the above solution, forming a stable dispersion. The mixed solution was subsequently transferred into a 50 mL Teflon-lined stainless-steel autoclaves that were heated at 120 °C for 8 h. After the autoclave was cooled to room temperature, the precursors were collected by centrifuging several times with ethanol and deionized water and drying at 80 °C for 6 h.

**Synthesis of the (MnFeCoNi)-precursor and the (FeCoNi)-precursor:** The synthesis of (MnFeCoNi)-precursor or (FeCoNi)-precursor is the same as that of the high-entropy metal precursor, except that the corresponding metal salts are selectively added. For the synthesis (MnFeCoNi)-precursor, the added salts are manganese chloride, ferric nitrate, cobalt chloride and nickel chloride. When synthesizing (FeCoNi)-precursor, the metal salts added are ferric nitrate, cobalt chloride and nickel chloride.

**Synthesis of the HEM-HENMC:** The upstream gas method was used to prepare the HEM-HENMC. Firstly, the 0.5 g of  $\text{Na}_2\text{HPO}_2 \cdot \text{H}_2\text{O}$  and 0.5 g thiourea were put on the upstream end and 0.2 g of the as-prepared high entropy metal precursor was put on the downstream end of the tube furnace. Subsequently, the tube furnace was heated to 450 °C at a heating rate of 2 °C  $\text{min}^{-1}$  and kept for for 2 h under a  $\text{N}_2$  atmosphere. After the simultaneous vulcanization and phosphatization process, the resultant product was washed with deionized water and dried at 60 °C under vacuum for 6 h, which was named as HEM-HENMC. The synthesis conditions for (MnFeCoNi)-P/S, (FeCoNi)-P/S, (CrMnFeCoNi)- $\text{N}_2$ , (CrMnFeCoNi)-P, (CrMnFeCoNi)-S and (CrMnFeCoNi)- $\text{O}_2$  are

similar to the synthesis of HEM-HENMC, except the different calcination atmospheres as detailed in Table S1.

**Characterizations:** The products' X-ray diffraction (XRD) patterns were collected on a Bruker D8 ADVANCE diffractometer with Cu  $K_{\alpha}$  radiation. Scanning electron microscopy (SEM) images were obtained on a Hitachi S-4800 scanning electron microscope with an accelerating voltage of 10 kV. Transmission electron microscope (TEM) and element mapping were acquired on JEM-2800 Plus with an electron acceleration energy of 200 kV. X-ray photoelectron spectroscopy (XPS) (PHI 5000 versa probe type) was used to characterize the chemical environment of the elements in the samples.

**Electrochemical OER measurements:** Electrochemical measurements were performed in a standard three-electrode cell in an electrolyte of 1 M KOH (90 %, reagent grade, Shanghai Macklin Biochemical Co., Ltd.) interfaced with a CHI760E electrochemical analyzer (CH Instruments, Inc., Shanghai). Before every measurement, the cell was thoroughly rinsed with pre-boiled DI water. A carbon rod and an Hg/HgO electrode were used as the counter and reference electrodes, respectively. Working electrodes were prepared as follows. Firstly, the catalyst ink was prepared by dispersing the catalyst (5 mg) in a mixed solvent (0.5 mL) containing 0.02 mL of a 5.0 wt.% Nafion solution and 1:3 (v/v) isopropanol/water. The ink was prepared by sonication for  $\geq 30$  min. Next, 40  $\mu$ L of the ink was dropped onto a glassy carbon electrode with a diameter of 3 mm and the droplet was allowed to air-dry. The mass loading of the catalysts was about 0.14 mg  $\text{cm}^{-2}$ , calculated from the concentration and volume of the catalyst ink applied on the glassy carbon electrode. A commercial  $\text{IrO}_2$  electrocatalyst was used to benchmark electrocatalyst performance (loading also 0.14 mg  $\text{cm}^{-2}$ ). The linear sweep voltammetry (LSV) measurements were performed in an electrolyte of 1 M KOH, using a scan rate of 5  $\text{mV s}^{-1}$ , in a potential range from 1.0 to 1.65 V versus reversible hydrogen electrode (RHE).

**Electrochemical ORR measurements:** The catalyst ink for ORR were prepared through the same way for OER. The ORR performances were also evaluated in 1 M KOH electrolyte using a three-electrode system. It included a rotating ring disk electrode (RRDE) as the working electrode, a carbon rod as the counter electrode, and a saturated Hg/HgO as the reference electrode. Before any tests, the 1 M KOH electrolyte was first saturated with  $\text{O}_2$  or  $\text{N}_2$  by purging with the appropriate

gas. The gas flow was maintained during the whole experiments. The linear sweep voltammetry (LSV) measurements were performed in O<sub>2</sub> or N<sub>2</sub> saturated electrolytes at rotating speeds ranging from 400 to 2500 rpm, using a scan rate of 5 mV s<sup>-1</sup>. The accelerated durability tests for the HEM-HENMC were conducted by a constant voltage of 0.5 V in a 1 M O<sub>2</sub>-saturated KOH solution. The final oxygen reduction currents were obtained by subtracting the background currents measured in the N<sub>2</sub>-purged electrolyte from those measured in the O<sub>2</sub>-saturated electrolyte. All potentials derived from the RRDE tests in 1 M KOH were converted to RHE potentials and corrected with 94% iR-compensation. All potential values were calibrated to the reversible hydrogen potential (E<sub>RHE</sub>) based on the Nernst equation (E<sub>RHE</sub> = E<sub>GOE</sub> + 0.095 + 0.0591 × pH). The H<sub>2</sub>O<sub>2</sub> yield (% H<sub>2</sub>O<sub>2</sub>) and electron transfer number (n) were calculated using the following equations:

$$\%H_2O_2 = 200 \times \frac{I_R/N}{I_D + I_R/N} \quad \text{Se1}$$

$$n = 4 \times \frac{I_D}{I_D + I_R/N} \quad \text{Se2}$$

where I<sub>D</sub> is the disk current, I<sub>R</sub> is the ring current, and N is the collection efficiency of the ring electrode (0.37 in this work).

The electron transfer numbers for the oxygen reduction reaction were calculated from the linear slopes of J- versus ω-1/2 plots according to the Koutecký–Levich (K–L) equation:

$$\frac{1}{J} = \frac{1}{J_L} + \frac{1}{J_K} = \frac{1}{B\omega^{1/2}} + \frac{1}{J_K} \quad \text{Se3}$$

$$B = 0.62nFC_0(D_0)^{2/3}\nu^{-1/6} \quad \text{Se4}$$

$$J_K = nFkC_0 \quad \text{Se5}$$

where J is the measured current density, J<sub>K</sub> is the kinetic current density, J<sub>L</sub> is the diffusion-limited current density, ω is the angular velocity, n is the electron transfer number, F is the Faraday constant (96485 C mol<sup>-1</sup>), C<sub>0</sub> is the bulk concentration of O<sub>2</sub> (1.15 × 10<sup>-6</sup> mol cm<sup>-3</sup>), D<sub>0</sub> is the diffusion coefficient of O<sub>2</sub> in 1 M KOH (1.6 × 10<sup>-5</sup> cm<sup>2</sup> s<sup>-1</sup>), ν is the kinetic viscosity of the electrolyte, and k is the electron transfer rate constant. Tafel slopes was also determined from the K-L equation.

**Double-layer capacitance analyses:** The electrochemical surface area (ECSA) was measured by cycling the electrode in the non-Faradaic regions under the same conditions used for catalysis

measurements. The double-layer capacitance of the electrode ( $C_{dl}$ ,  $\text{mF cm}^{-2}$ ) was estimated by the following equation:

$$J = v \times C_{dl} \quad \text{Se6}$$

Where,  $v$  is the scan rate ( $\text{V s}^{-1}$ ),  $J$  is the evolution of non-Faradaic current density ( $\text{mA cm}^{-2}$ ).

$$ECSA = C_{dl}/C_{dlRef} \quad \text{Se7}$$

Where,  $C_{dlRef}$  is the double-layer capacitance of the electrode ( $C_{dlRef} = 40 \mu\text{F cm}^{-2}$ ).

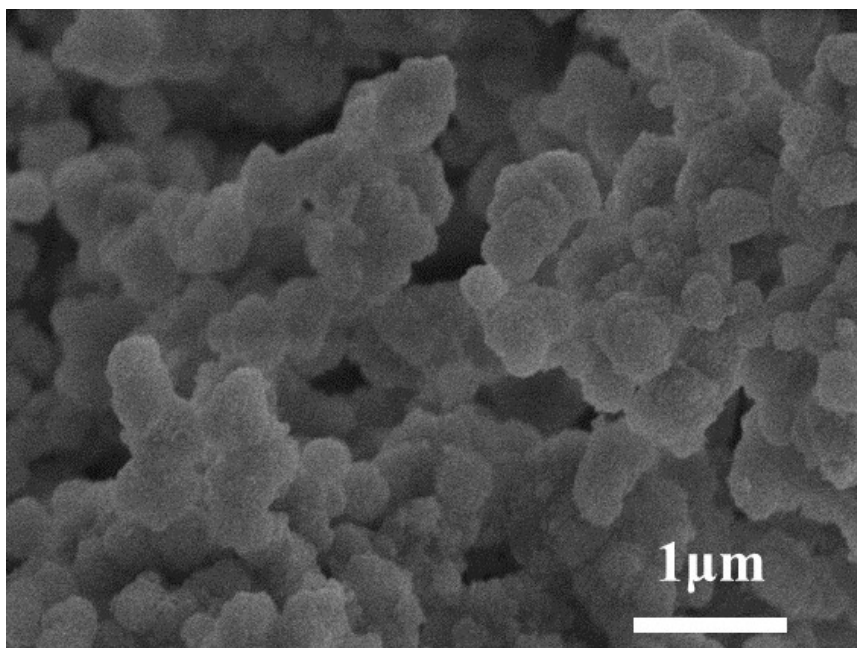

**Figure S1.** SEM image of HEM-HENMC.

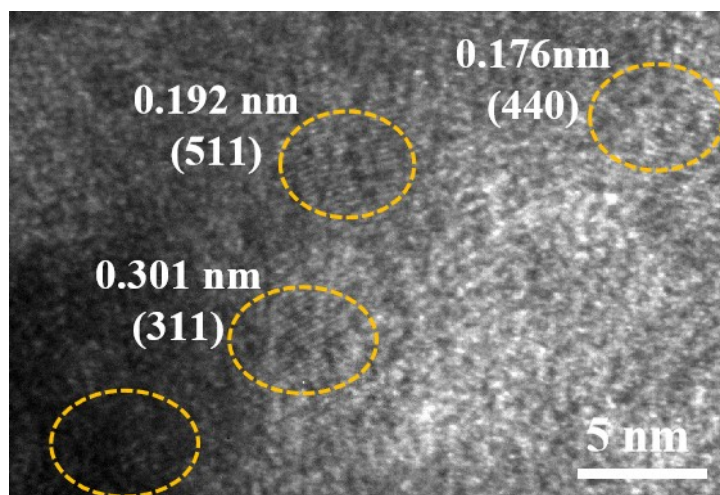

**Figure S2.** TEM image of HEM-HENMC.

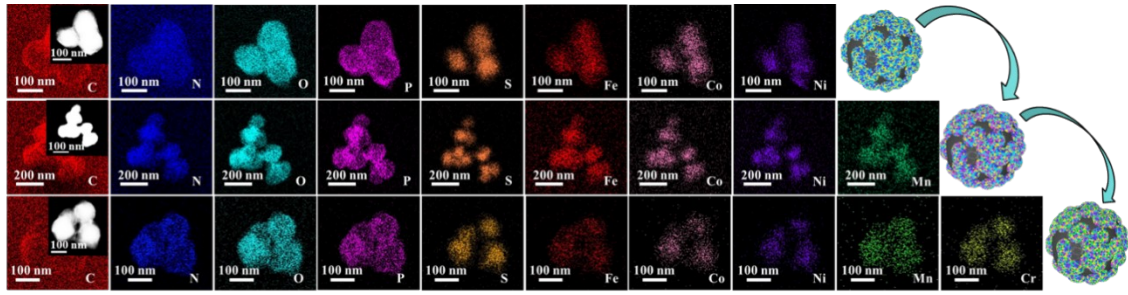

**Figure S3.** EDS elemental mappings for HEM-HENMC, quaternary (MnFeCoNi)-high entropy nonmetal system and ternary (FeCoNi)-high entropy nonmetal system.



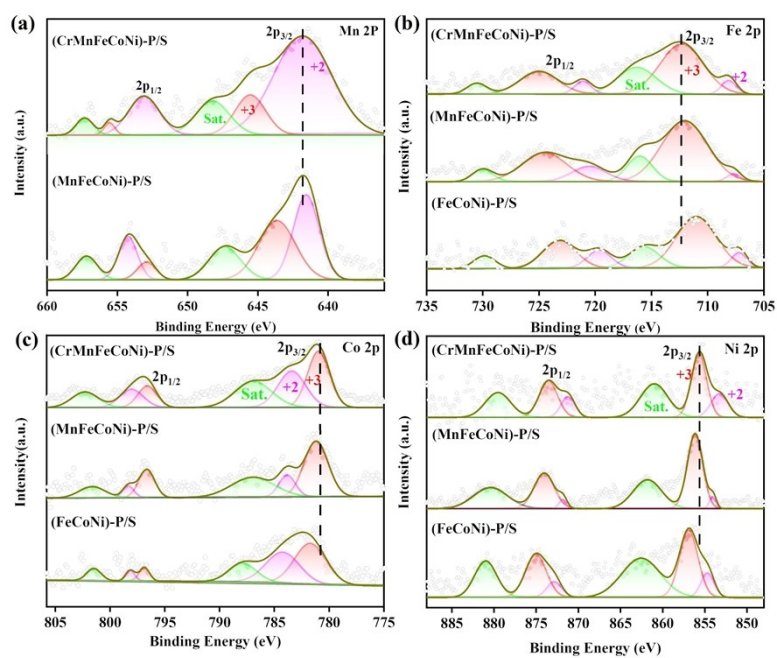

**Figure S4.** High resolution XPS spectra of HEM-HENMC, quaternary (MnFeCoNi)-high entropy nonmetal system and ternary (FeCoNi)-high entropy nonmetal system: (a) Mn 2p; (b) Fe 2p; (c) Co 2p and (d) Ni 2p.

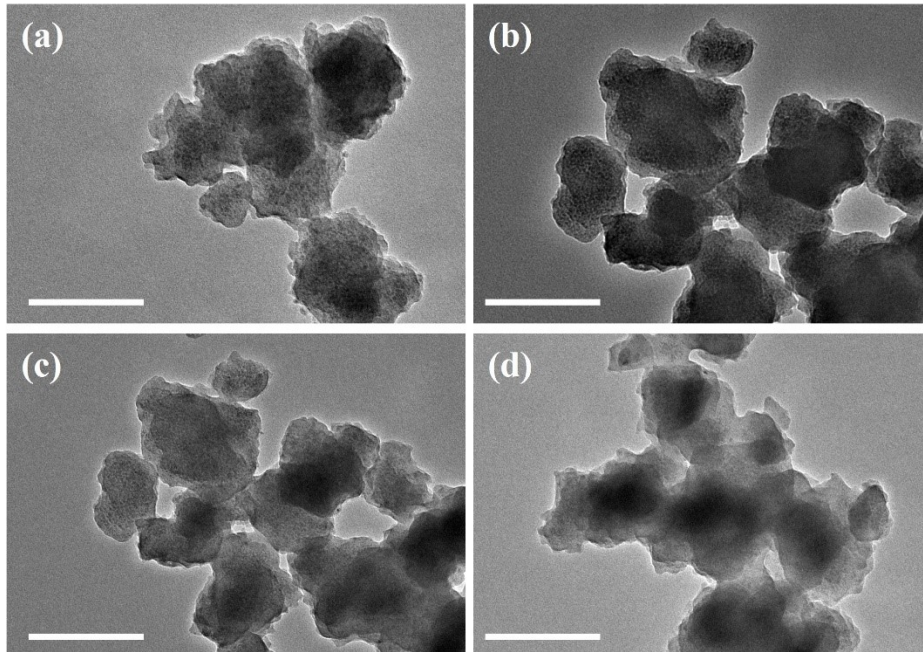

**Figure S5.** TEM images of (a) (CrMnFeCoNi)-P; (b) (CrMnFeCoNi)-N<sub>2</sub>; (c) (CrMnFeCoNi)-S and (d) (CrMnFeCoNi)-O<sub>2</sub>. The scale bars are 200 nm.

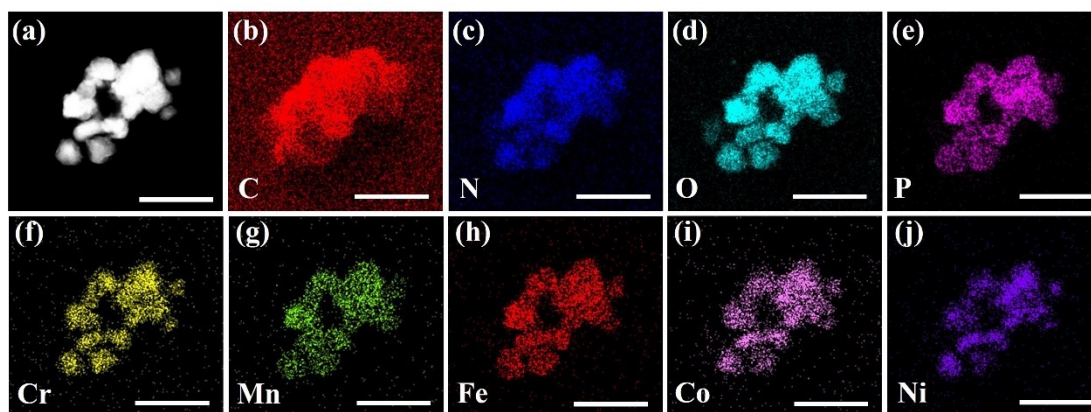

**Figure S6.** STEM-EDX elemental mappings of (CrMnFeCoNi)-P. The scale bars are 200 nm.

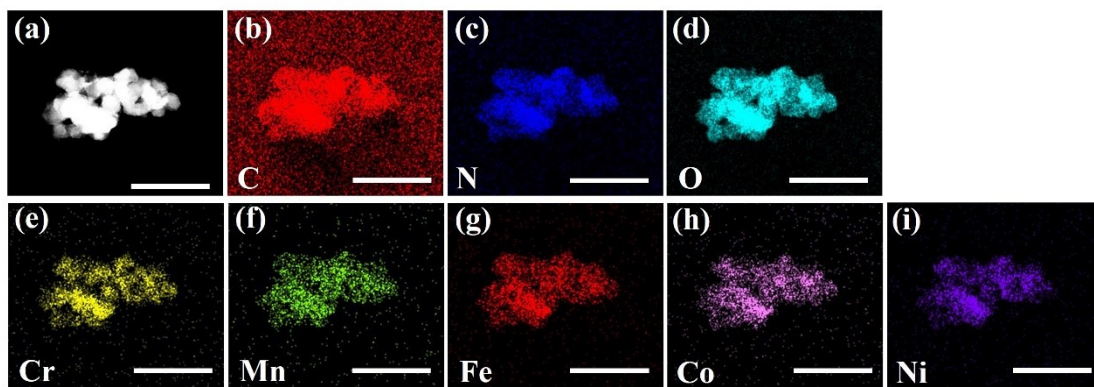

**Figure S7.** STEM-EDX elemental mappings of (CrMnFeCoNi)-N<sub>2</sub>. The scale bars are 200 nm.

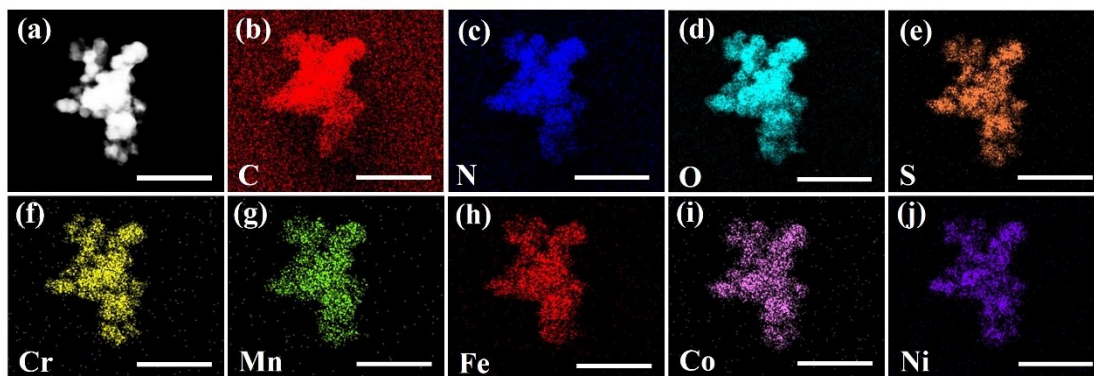

**Figure S8.** STEM-EDX elemental mappings of (CrMnFeCoNi)-S. The scale bars are 200 nm.

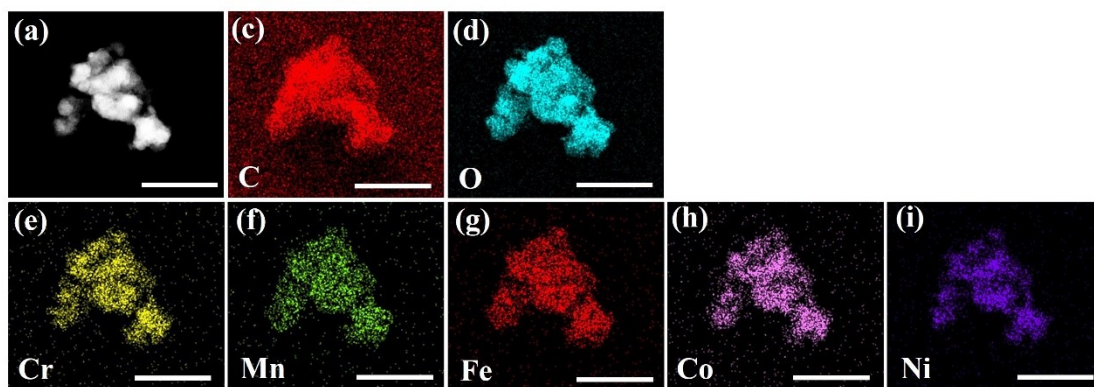

**Figure S9.** STEM-EDX elemental mappings of (CrMnFeCoNi)-O<sub>2</sub>. The scale bars are 200 nm.

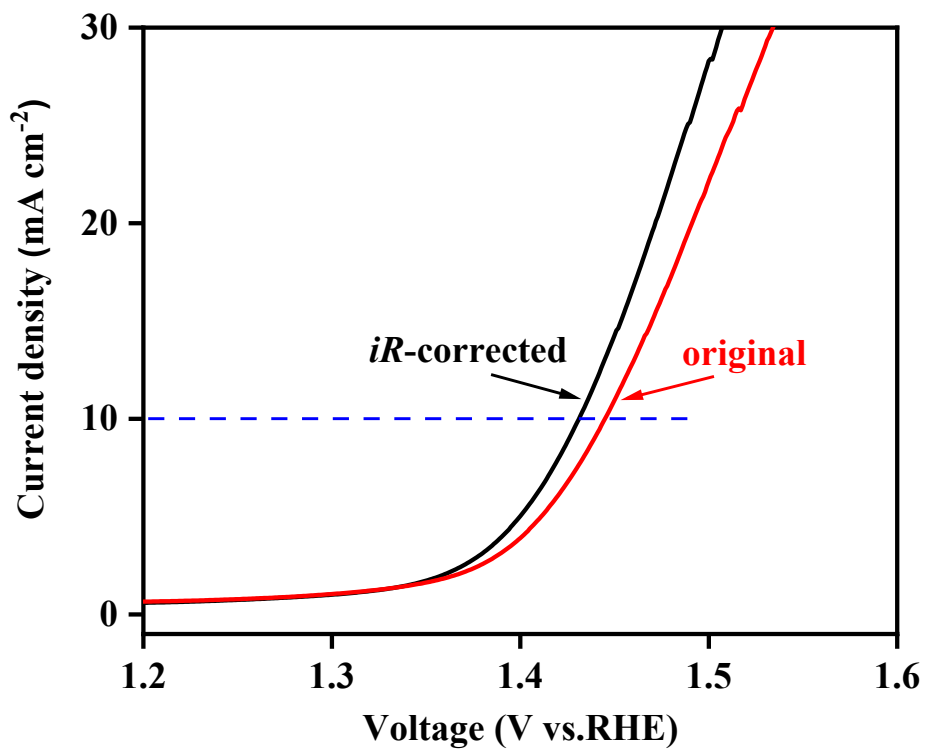

**Figure S10.** The original and iR-corrected LSV curves of HEM-HENMC.

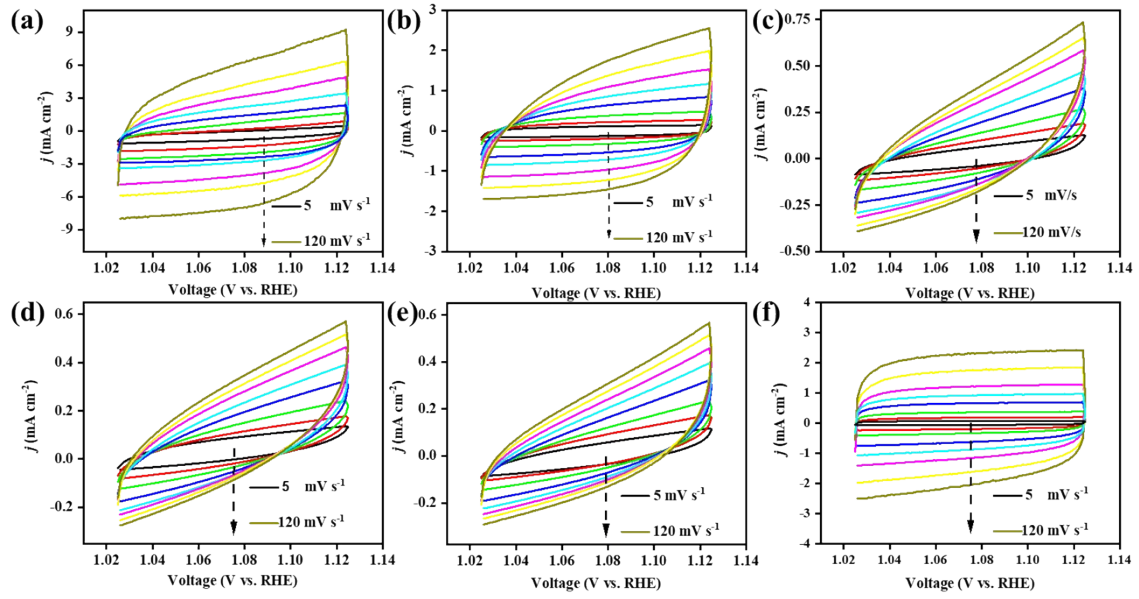

**Figure S11.** Cyclic voltammetry (CV) curves at various scan rates ( $5\text{-}120\text{ mV s}^{-1}$ ) of (a) (CrMnFeCoNi)-P/S; (b) (CrMnFeCoNi)-P; (c) (CrMnFeCoNi)-S; (d) (CrMnFeCoNi)-N<sub>2</sub>; (e) (CrMnFeCoNi)-O<sub>2</sub> and (f) IrO<sub>2</sub>.



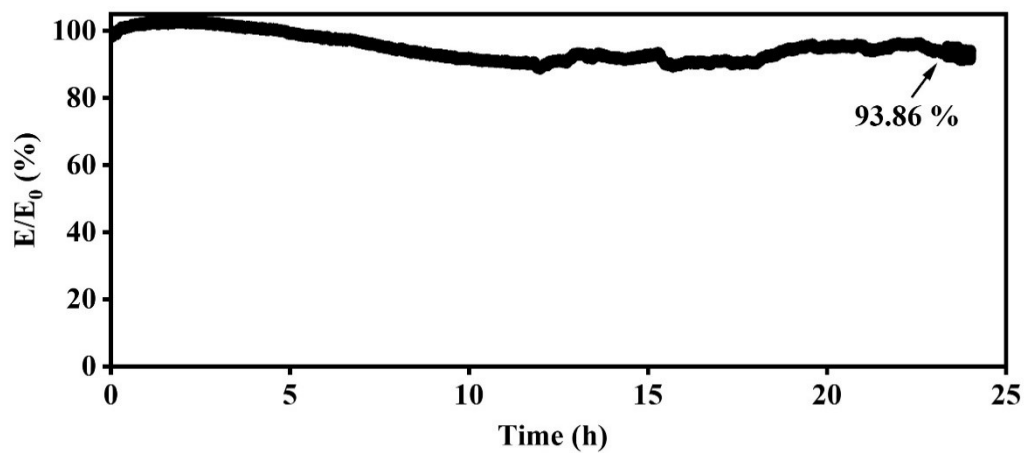

**Figure S12.** Long-time stability OER test of HEM-HENMC at a current density of around 60 mA cm<sup>-2</sup> for 24 h.

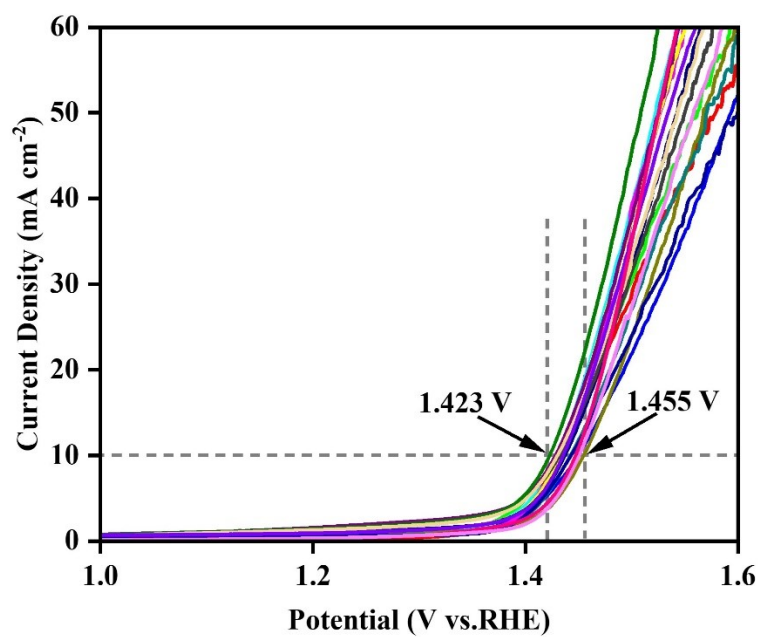

**Figure S13.** 20 OER polarization curves of HEM-HENMC from different synthetic batches.

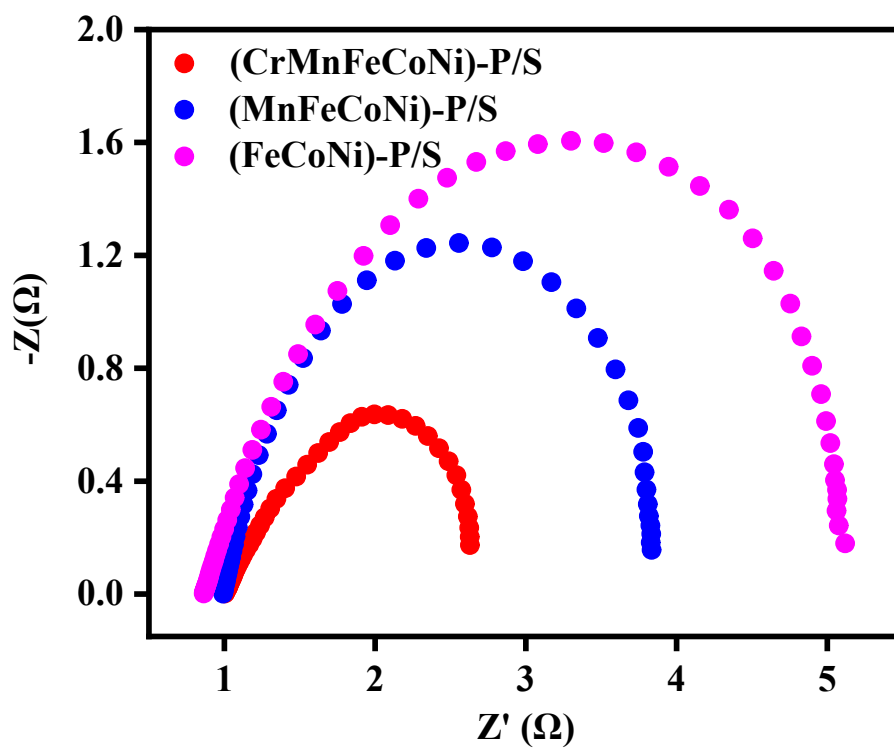

**Figure S14.** Electrochemical impedance spectra (EIS) of (CrMnFeCoNi)-P/S, (MnFeCoNi)-P/S and (FeCoNi)-P/S.

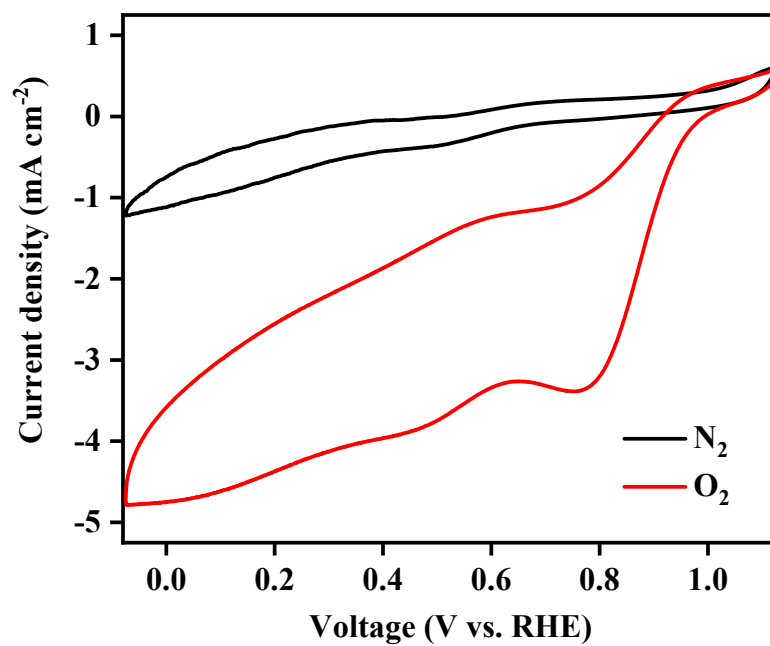

**Figure S15.** CV curves for HEM-HENMC in N<sub>2</sub> and O<sub>2</sub>-saturated 1 M KOH (scan rate: 5 mV s<sup>-1</sup>).

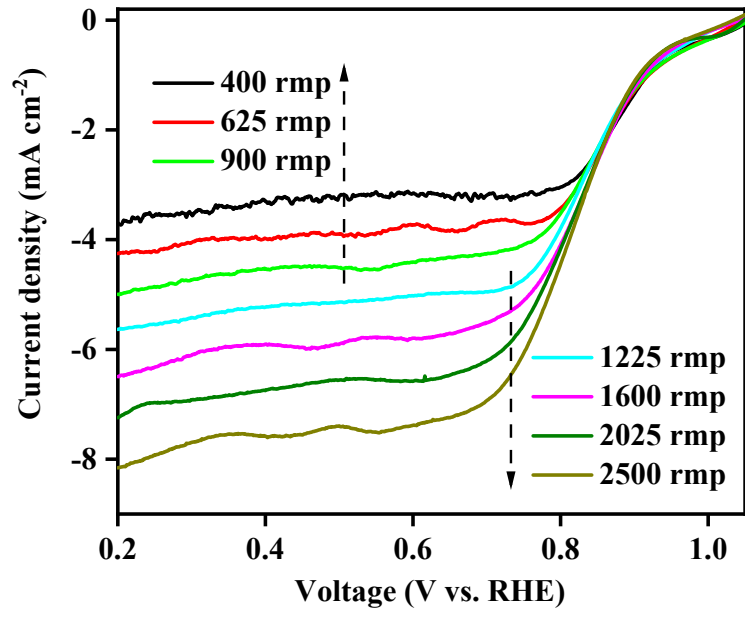

Figure S16. LSV curves of HEM-HENMC at different rotating speeds.

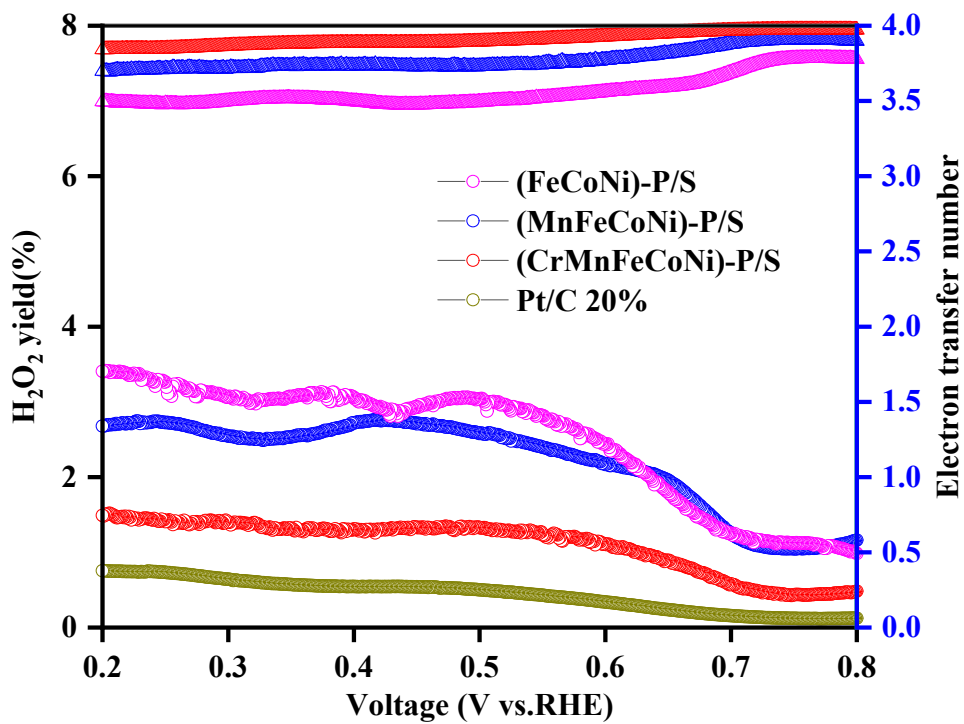

**Figure S17.** H<sub>2</sub>O<sub>2</sub> yields and electron transfer number in ORR of the (CrMnFeCoNi)-P/S, (MnFeCoNi)-P/S, (FeCoNi)-P/S and commercial Pt/C 5 wt.% catalysts.

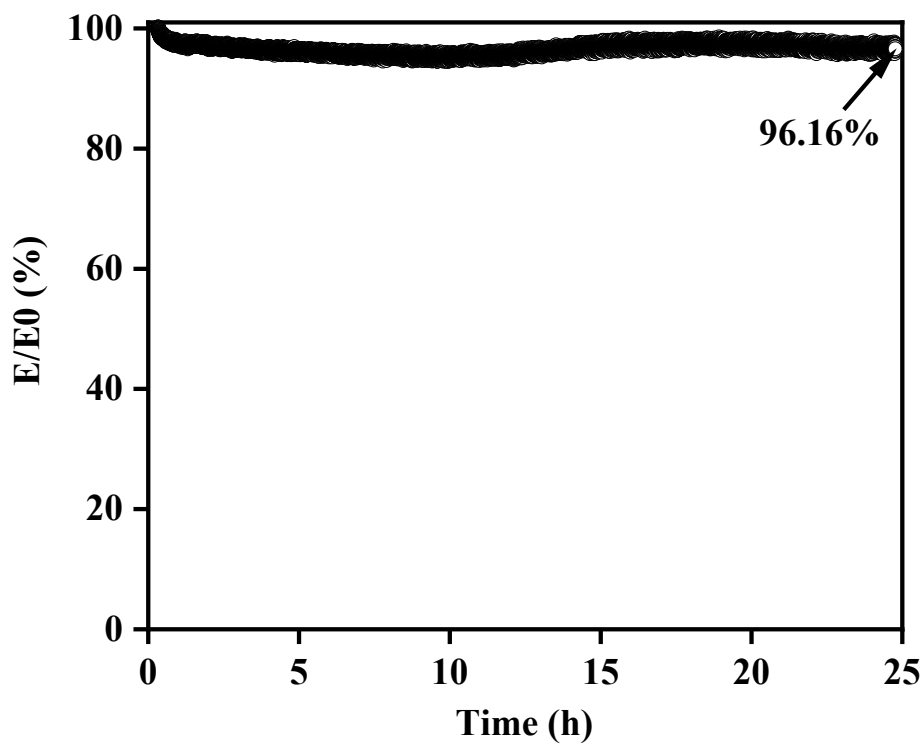

**Figure S18.** Durability ORR test of (CrMnFeCoNi)-P/S at a potential of 0.5 V (vs. RHE) for 25 h.

**Table S1** Post-processing annealing conditions for different samples

| Name                        | Precursor                    | Annealing atmosphere | Phosphorus/sulfur source          |
|-----------------------------|------------------------------|----------------------|-----------------------------------|
| (CrMnFeCoNi)-P/S            | high entropy metal precursor | N <sub>2</sub>       | sodium hypophosphite and thiourea |
| (MnFeCoNi)-P/S              | (MnFeCoNi)-precursor         | N <sub>2</sub>       | sodium hypophosphite and thiourea |
| (FeCoNi)-P/S                | (FeCoNi)-precursor           | N <sub>2</sub>       | sodium hypophosphite and thiourea |
| (CrMnFeCoNi)-N <sub>2</sub> | high entropy metal precursor | N <sub>2</sub>       | ---                               |
| (CrMnFeCoNi)-P              | high entropy metal precursor | N <sub>2</sub>       | sodium hypophosphite              |
| (CrMnFeCoNi)-S              | high entropy metal precursor | N <sub>2</sub>       | thiourea                          |
| (CrMnFeCoNi)-O <sub>2</sub> | high entropy metal precursor | O <sub>2</sub>       | ---                               |



**Table S2** OER performance comparison between HEM-HENMC and recently reported transition metal compounds.

| Catalyst                                                               | Electrolyte    | Overpotential<br>@10 mA cm <sup>-2</sup><br>(mV) | Reference                                                 |
|------------------------------------------------------------------------|----------------|--------------------------------------------------|-----------------------------------------------------------|
| Co-Fe-Ga-NiZn                                                          | 1 M KOH        | 370                                              | <i>Nano Res.</i> 2021, <b>15</b> , 4799                   |
| CoFeLaNiPt                                                             | 0.1 M KOH      | 377                                              | <i>Nat. Commun.</i> 2019, <b>10</b> , 2650                |
| Ni-CoP                                                                 | 1.0 M KOH      | 362                                              | <i>Appl. Catal. B: Environ.</i> 2023, <b>327</b> , 122444 |
| NiCo <sub>2</sub> S <sub>4</sub> @g-C <sub>3</sub> N <sub>4</sub> -CNT | 0.1 M KOH      | 330                                              | <i>Adv. Mater.</i> 2019, <b>31</b> , 1808281              |
| Fe <sub>5</sub> Co <sub>5</sub> Mo <sub>15</sub> O <sub>40</sub>       | 1.0 M KOH      | 308                                              | <i>ACS Energy Lett.</i> 2023, <b>8</b> , 4506             |
| HESMo                                                                  | 1 M KOH        | 303                                              | <i>Small Struct.</i> 2023, <b>4</b> , 2300012             |
| CrMnFeCoNi                                                             | 1 M KOH        | 265                                              | <i>Energy Storage Mater.</i> 2023, <b>58</b> , 287        |
| N-NiS <sub>2</sub> NSs                                                 | 1 M KOH        | 260                                              | <i>ACS Catal.</i> 2022, <b>12</b> , 13234                 |
| CeO <sub>2</sub> @CoS/MoS <sub>2</sub>                                 | 1 M KOH        | 247                                              | <i>Chem. Eng. J.</i> 2021, <b>420</b> , 127595            |
| Ce-CoP                                                                 | 1.0 M KOH      | 240                                              | <i>Adv. Energy Mater.</i> 2023, <b>13</b> , 2301162       |
| CuS@MoSe <sub>2</sub>                                                  | 1.0 M KOH      | 236                                              | <i>ACS Nano</i> 2022, <b>16</b> , 15425                   |
| (CrMnFeCoNi)S <sub>x</sub>                                             | 1 M KOH        | 218                                              | <i>Adv. Energy Mater.</i> 2021, <b>11</b> , 2002887       |
| <b>HEM-HENMC</b>                                                       | <b>1 M KOH</b> | <b>211.9</b>                                     | <b>This work</b>                                          |

**Table S3** ORR performance comparison between HEM-HENMC and recently reported transition metal compounds.

| Catalyst                             | Electrolyte      | $E_{1/2}$ (V) | Reference                                               |
|--------------------------------------|------------------|---------------|---------------------------------------------------------|
| LCMO <sub>64</sub>                   | 0.1 M KOH        | 0.85          | <i>Adv. Mater.</i> 2024, <b>36</b> , 2309266            |
| Co <sub>3</sub> O <sub>4</sub> -CP-3 | 0.1 M KOH        | 0.69          | <i>Adv. Mater.</i> 2024, <b>36</b> , 2405129            |
| FeCo-MHs                             | 1.0 M KOH        | 0.95          | <i>J. Am. Chem. Soc.</i> 2023, <b>145</b> , 21273-21283 |
| MFO-MS                               | 1.0 M KOH        | 0.71          | <i>J. Energy Chem.</i> 2024, <b>97</b> , 12-19          |
| Co-HAT-CN-H                          | 1.0 M KOH        | 0.78          | <i>Carbon Energy</i> 2023, <b>5</b> , e303              |
| LMNO-4h                              | 0.1 M KOH        | ~0.8          | <i>ACS Energy Lett.</i> 2024, <b>9</b> , 3440-3447      |
| MnN/C-9                              | 0.1 M KOH        | 0.87          | <i>Nat. Mater.</i> 2024. DOI:10.1038/s41563-024-01998-7 |
| <b>HEM-HENMC</b>                     | <b>1.0 M KOH</b> | <b>0.84</b>   | <b>This work</b>                                        |
